# Supplementary material for: Developing a Diagnostic Model to Predict the Risk of Asthma Based on Ten Macrophage-Related Gene Signatures
Source: PubMed Central journal article supplement (PMC9713468; doi:10.1155/2022/3439010), 2022-11-23

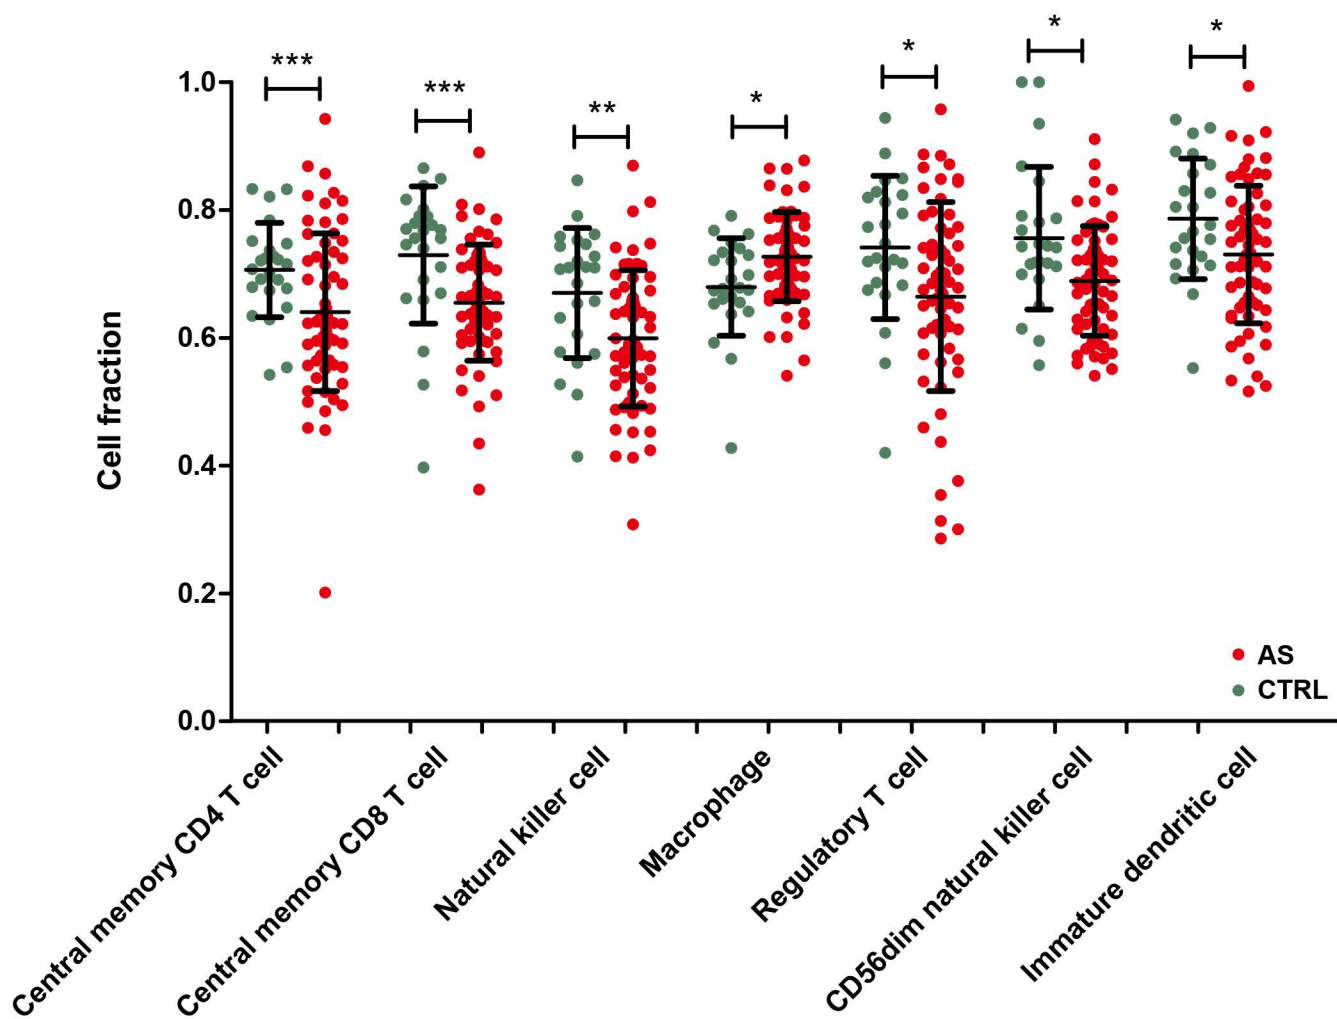

Supplement: 3439010.f3.pdf [file 3439010.f3.pdf]
